# Supplementary material for: Genetic Mapping of Tolerance to Iron Deficiency Chlorosis in Peanut (Arachis Hypogaea L.)
Source: Research Square preprint supplement (doi:10.21203/rs.3.rs-1211673/v1), 2022-01-18
Supplement: Supplementary file 1 [file 5e145e9e8be9912abe8ef4c3.xlsx]

## Sheet: Лист1
Supplemental Table S2 Monthly Meteorological data of Regional Agricultural Research Station, Vijayapur, Karnataka for the year 2019 and 2020
Month	Air Temperature (0C)				Relative humidity				Wind Speed (Km/ph)		Sunshine Duration (H)		Normal		Total Rainfall (mm)		Rainy Days		Pan Evaporation (mm day-1)
	Max.		Min.		AM (%)		PM (%)
	2019	2020	2019	2020	2019	2020	2019	2020	2019	2020	2019	2020	Rainfall (mm)	Rainy days	2019	2020	2019	2020	2019	2020
January	30.5	30.9	12.1	15.4	64	81	27	37	4.2	4	9.2	8.1	4.1	0	0	0	0	0	4.7	3.6
February	33.7	32.4	16.4	16.6	56	69	25	31	5.8	5.2	9.8	9.3	2.7	0	0	0	0	0	7.1	5.5
March	37.6	35.6	19.8	19.6	49	60	20	27	6.6	5.9	9.5	9	5.6	0	0	6.9	0	2	9.2	7.4
April	39.7	38.8	23.5	23.3	56	64	19	24	7.8	7	9.3	8.9	20.9	2	46.2	19.1	2	3	9.9	8.1
May	40.5	39.5	24.4	24.2	64	75	19	28	11.5	10.4	11.7	9	39.6	3	34.6	112.9	3	4	11	9.2
June	35.1	33	23	22.6	82	88	45	54	15.1	11.5	6.9	7	85.4	6	92.6	93.4	5	7	7.2	5.5
July	31.6	30.9	22.3	22	85	91	56	63	14.2	9.8	4.2	-	72.5	5	44.1	187.6	4	12	5	3.9
August	30.7	29.7	21.6	21.7	87	91	61	66	14.1	12.4	5.2	-	78	5	38.8	58.4	6	5	4.6	3.6
September	30.6	30.4	21.4	21.7	90	92	58	67	10.8	7.1	4.4	5.6	151.6	8	131.1	267.3	7	13	4	3.5
October	29.3	30.2	20.9	20.7	92	91	65	59	4.9	5	5.8	5.7	97.3	6	165.9	112.6	10	6	2.9	2.9
November	29.6	29.9	17.8	16.5	89	84	50	44	3.8	4.3	8	7.7	29.5	2	16.5	4	2	0	2.9	3.9
December	29.4	29.8	16	13.4	89	82	47	35	3.9	3.6	6.6	9.1	7.2	1	7	0	1	0	3	3.6
